# Supplementary material
Source: Springer Nature journal article supplement (https://www.springermedizin.de/resource/supplementary/12982_2007_53_MOESM21_ESM.pdf/9604370)
Supplement: MOESM21 [file 9604370]

Romanian / Limba Română

Editorial

**Bariera lingvistică, acces deschis, publicații științifice, traducere.**

Autor: Isaac Chun-Hai FUNG

Rezumat

Amploarea comunicării științifice internaționale interdisciplinare cunoaște o evoluție fără precedent. Pe fondul globalizării, limba engleză este dominantă în toate domeniile de activitate. În vederea depășirii barierei lingvistice, sugerăm următoarele patru opțiuni: 1) rezumate în limbi alternative furnizate de către autori, 2) folosirea mijloacelor de traducere web de tip Wiki, 3) crearea unui comitet internațional de traducători științifici, 4) publicarea unei ediții alternative a revistelor sau jurnalelor științifice într-o alta limbă. Revista *Emerging Themes in Epidemiology* informează cititorii că în curând traducerile rezumatelor sau a publicațiilor vor fi acceptate ca fișiere suplimentare.
